# Supplementary material
Source: Springer Nature journal article supplement (https://www.springermedizin.de/resource/supplementary/13013_2009_305_MOESM20_ESM.pdf/9631610)

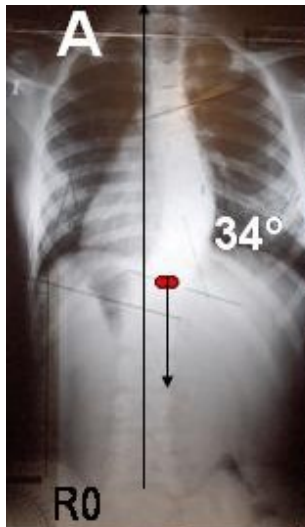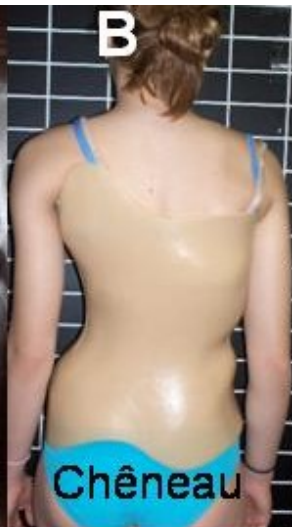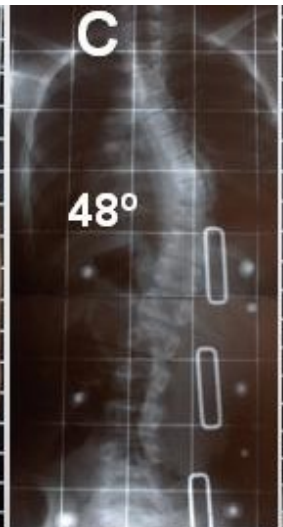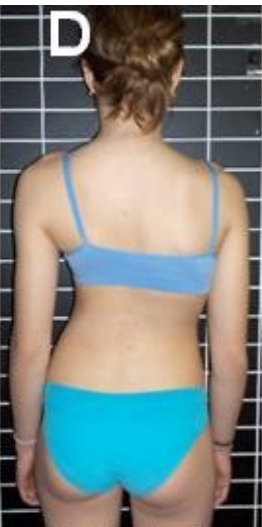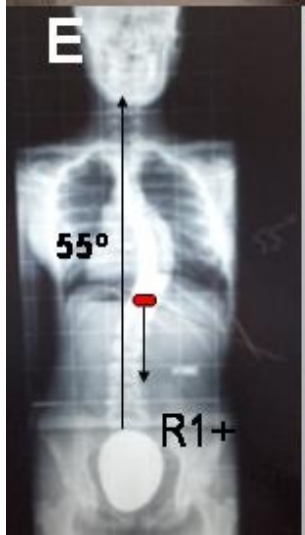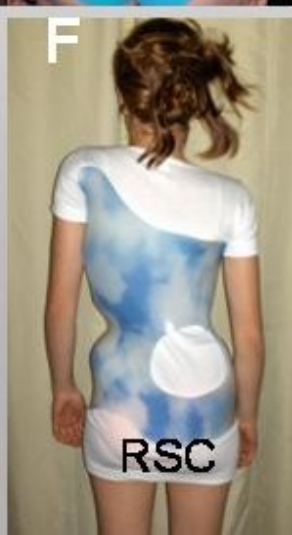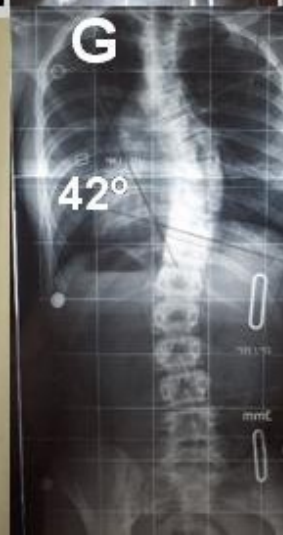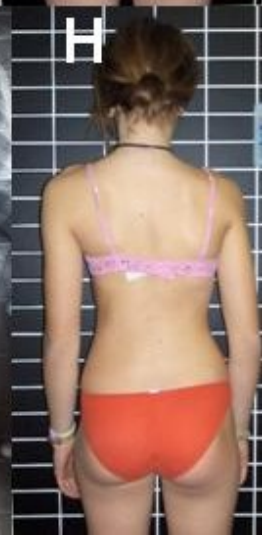

Supplement: MOESM20 [file 9631610]
